# Supplementary material for: Aggregation of Slightly Buoyant Microplastics in Three-Dimensional Vortex Flows
Source: Copernicus journal article supplement (doi:10.5194/egusphere-2023-1624), 2023-07-27
Supplement: Supplementary file 1 [file egusphere-2023-1624-supplement.pdf]

## Supplementary Material.

### Slow Manifold Reduction by Multiple-Scale Expansion

Begin with equations (2) and (3), written in the form

$$\frac{dx_i}{dt} = v_i \quad (13a)$$

$$\varepsilon \frac{dv}{dt} = \varepsilon \frac{3R}{2} \frac{Du}{Dt} + (v - u) + \varepsilon \left(1 - \frac{3R}{2}\right) g_r + 3\varepsilon R \Omega \times (u - v) + 2\varepsilon \left(\frac{3R}{2} - 1\right) \Omega \times v \quad (13b)$$

Let  $\tilde{t} = (t - t_o)/\varepsilon$  represent a fast time variable, and consider the particle position and velocity to be functions of  $t$  and  $\tilde{t}$ , which are formally treated as separate variables. Thus  $d/dt$  is replaced by  $\varepsilon^{-1} \partial/\partial \tilde{t} + \partial/\partial t$ , where it is understood that both  $\partial/\partial t$  and  $\partial/\partial \tilde{t}$  are to be interpreted as particle-following derivatives (and not derivatives with position held constant). Note that the background flow does not depend on  $\tau$ , and thus the substantial derivative  $D\vec{u}/Dt$  is with respect to  $t$  alone. However, dependence on  $\tilde{t}$  is introduced when the derivative is evaluated at the position  $\vec{x}(\tilde{t}, t)$ .

Expanding both variables in a power series in  $\varepsilon$  leads to

$$\vec{x} = \vec{x}^{(0)}(\tilde{t}, t) + \varepsilon \vec{x}^{(1)}(\tilde{t}, t) + \dots$$

$$\vec{v} = \vec{v}^{(0)}(\tilde{t}, t) + \varepsilon \vec{v}^{(1)}(\tilde{t}, t) + \dots$$

Substitution into (13) leads to

$$\left( \varepsilon^{-1} \frac{\partial \vec{x}^{(0)}}{\partial \tilde{t}} + \frac{\partial \vec{x}^{(0)}}{\partial t} \right) + \varepsilon \left( \varepsilon^{-1} \frac{\partial \vec{x}^{(1)}}{\partial \tilde{t}} + \frac{\partial \vec{x}^{(1)}}{\partial t} \right) + \dots = \vec{v}^{(0)} + \varepsilon \vec{v}^{(1)} + \dots, \quad (14a)$$

and

$$\begin{aligned} & \varepsilon \left( \varepsilon^{-1} \frac{\partial \vec{v}^{(0)}}{\partial \tilde{t}} + \frac{\partial \vec{v}^{(0)}}{\partial t} \right) + \varepsilon^2 \left( \varepsilon^{-1} \frac{\partial \vec{v}^{(1)}}{\partial \tilde{t}} + \frac{\partial \vec{v}^{(1)}}{\partial t} \right) + \dots = \vec{u}(\vec{x}^{(0)}(\tilde{t}, t), t) - \vec{v}^{(0)} + \varepsilon \frac{\partial \vec{u}}{\partial x_j} x_j^{(1)} \\ & - \varepsilon v_i^{(1)} + \varepsilon \left[ \frac{3R}{2} \frac{D\vec{u}}{Dt} + 3R\vec{\Omega} \times (\vec{u} - \vec{v}^{(0)}) + 2 \left( \frac{3R}{2} - 1 \right) \vec{\Omega} \times \vec{v}^{(0)} + \left( 1 - \frac{3R}{2} \right) \vec{g}_r \right] + \dots, \end{aligned} \quad (14b)$$

where again, the derivatives of  $\vec{u}$  are evaluated at  $\vec{x}^{(0)}$ . To lowest order, we have

$$\frac{\partial \vec{x}^{(0)}}{\partial \tilde{t}} = 0 \quad \text{and} \quad \frac{\partial \vec{v}^{(0)}}{\partial \tilde{t}} = \vec{u}(\vec{x}^{(0)}(\tilde{t}, t), t) - \vec{v}^{(0)}. \quad (15a,b)$$

Thus  $\vec{x}^{(0)} = \vec{x}^{(0)}(t)$ , and since the right-hand side of (15b) is then independent of  $\tilde{t}$ , it follows that

$$\vec{v}^{(0)} = \vec{u}(\vec{x}^{(0)}(t), t) + \vec{c}^{(0)}(t)e^{-\tilde{t}}. \quad (16)$$

If a particle is initiated with a velocity that differs from the local fluid velocity by more than  $O(\varepsilon)$ , then the drag on the particle brings it  $O(\varepsilon)$  close to the fluid velocity over a time scale of  $O(\varepsilon^{-1})$ . This behavior is consistent with the requirement in Fenichel theory that the background flow is a normally attracting manifold.

At the next order of approximation [ $O(\theta)$  in 14a], we have

$$\frac{\partial \vec{x}^{(1)}}{\partial \tilde{t}} = -\frac{\partial \vec{x}^{(0)}}{\partial t} + \vec{v}^{(0)} = -\frac{\partial \vec{x}^{(0)}}{\partial t} + \vec{u}(\vec{x}^{(0)}(t), t) + \vec{c}^{(0)}(t)e^{-\tilde{t}}$$

After decay of the final term, the remaining terms on the right-hand side depend only on  $t$  and therefore lead to secular growth in  $\tau$  of  $x_i^{(1)}$ . To prevent this growth we must set these terms to zero:

$$\frac{\partial \vec{x}^{(0)}}{\partial t} = \vec{u}(\vec{x}^{(0)}(t), t) \quad (17)$$

Which indicates simply that following the decay from the initial velocity, the particle follows the flow at leading order. Solving the remaining equation for  $\vec{x}^{(1)}$  then gives

$$\vec{x}^{(1)} = \vec{x}_o^{(1)}(t) - \vec{c}^{(1)}(t)e^{-\tilde{t}} \quad (18)$$

Proceeding to  $O(\varepsilon)$  in (14b) then gives

$$\begin{aligned} \frac{\partial \vec{v}^{(1)}}{\partial \tilde{t}} + \vec{v}^{(1)} = & -\frac{\partial \vec{v}^{(0)}}{\partial t} + \left( \frac{\partial \vec{u}}{\partial x_j} \right)_{x_i=x_i^{(0)}} x_j^{(1)} + \frac{3R}{2} \frac{D\vec{u}}{Dt} + 3R\vec{\Omega} \times (\vec{u} - \vec{v}^{(0)}) \\ & + 2 \left( \frac{3R}{2} - 1 \right) \vec{\Omega} \times \vec{v}^{(0)} + \left( 1 - \frac{3R}{2} \right) \vec{g}_r \end{aligned}$$

Using (16) to substitute for  $v_i^{(0)}$  on the right-hand side, and keeping in mind that  $\frac{\partial}{\partial t}$  represents not a local time derivative but a time derivative with  $\tilde{t}$  held constant, we have

$$\frac{\partial \vec{v}^{(0)}}{\partial t} = \frac{\partial}{\partial t} \vec{u}(\vec{x}^{(0)}(t), t) + \frac{\partial \vec{c}^{(0)}}{\partial t} e^{-\tilde{t}} = \frac{D\vec{u}}{Dt} + \frac{\partial \vec{c}^{(0)}}{\partial t} e^{-\tilde{t}}$$

Using this expression as well as (18) to substitute for and  $x_j^{(1)}$  leads to, after some regrouping of terms, to

$$\frac{\partial \vec{v}^{(1)}}{\partial \tilde{t}} + \vec{v}^{(1)} = \vec{a}^{(1)}(t) - \vec{b}^{(1)}(t)e^{-\tilde{t}}, \quad (19)$$

where

$$\vec{a}^{(1)}(t) = \frac{\partial \vec{u}}{\partial x_j} x_{o,j}^{(1)}(t) + \left( \frac{3R}{2} - 1 \right) \left[ \frac{D\vec{u}}{Dt} - \vec{g}_r + 2\vec{\Omega} \times \vec{u}^{(0)} \right],$$

and

$$\vec{b}^{(1)}(t) = \frac{\partial c_i^{(0)}}{\partial t} + \frac{\partial \vec{u}}{\partial x_j} c_j^{(0)} + 3R\vec{\Omega} \times \vec{c}^{(0)}.$$

The solution to (19) is

$$\vec{v}^{(1)} = \vec{a}^{(1)}(t) - \vec{b}^{(1)}(t)\tilde{t}e^{-\tilde{t}} \quad (20)$$

We can now write down an expression for the particle velocity on the slow manifold, obtained by taking the limit  $\tilde{t} \rightarrow \infty$  in (16) and (20):

$$\vec{v}^{(0)} + \varepsilon\vec{v}^{(1)} = \vec{u}(\vec{x}^{(0)}(t), t) + \varepsilon \frac{\partial \vec{u}}{\partial x_j} x_{o,j}^{(1)}(t) + \varepsilon \left( \frac{3R}{2} - 1 \right) \left[ \frac{D\vec{u}}{Dt} - \vec{g}_r + 2\vec{\Omega} \times \vec{u}^{(0)} \right]$$

or, noting that  $\vec{x} = \vec{x}^{(0)} + \varepsilon\vec{x}_o^{(1)}(t) + O(\varepsilon^2)$  on the slow manifold:

$$\frac{d\vec{x}}{dt} = \vec{u}(\vec{x}(t), t) + \varepsilon \left( \frac{3R}{2} - 1 \right) \left[ \frac{D\vec{u}}{Dt} - \vec{g}_r + 2\vec{\Omega} \times \vec{u}^{(0)} \right] + O(\varepsilon^2). \quad (2)$$
